# Supplementary material
Source: PubMed Central journal article supplement (PMC151378)

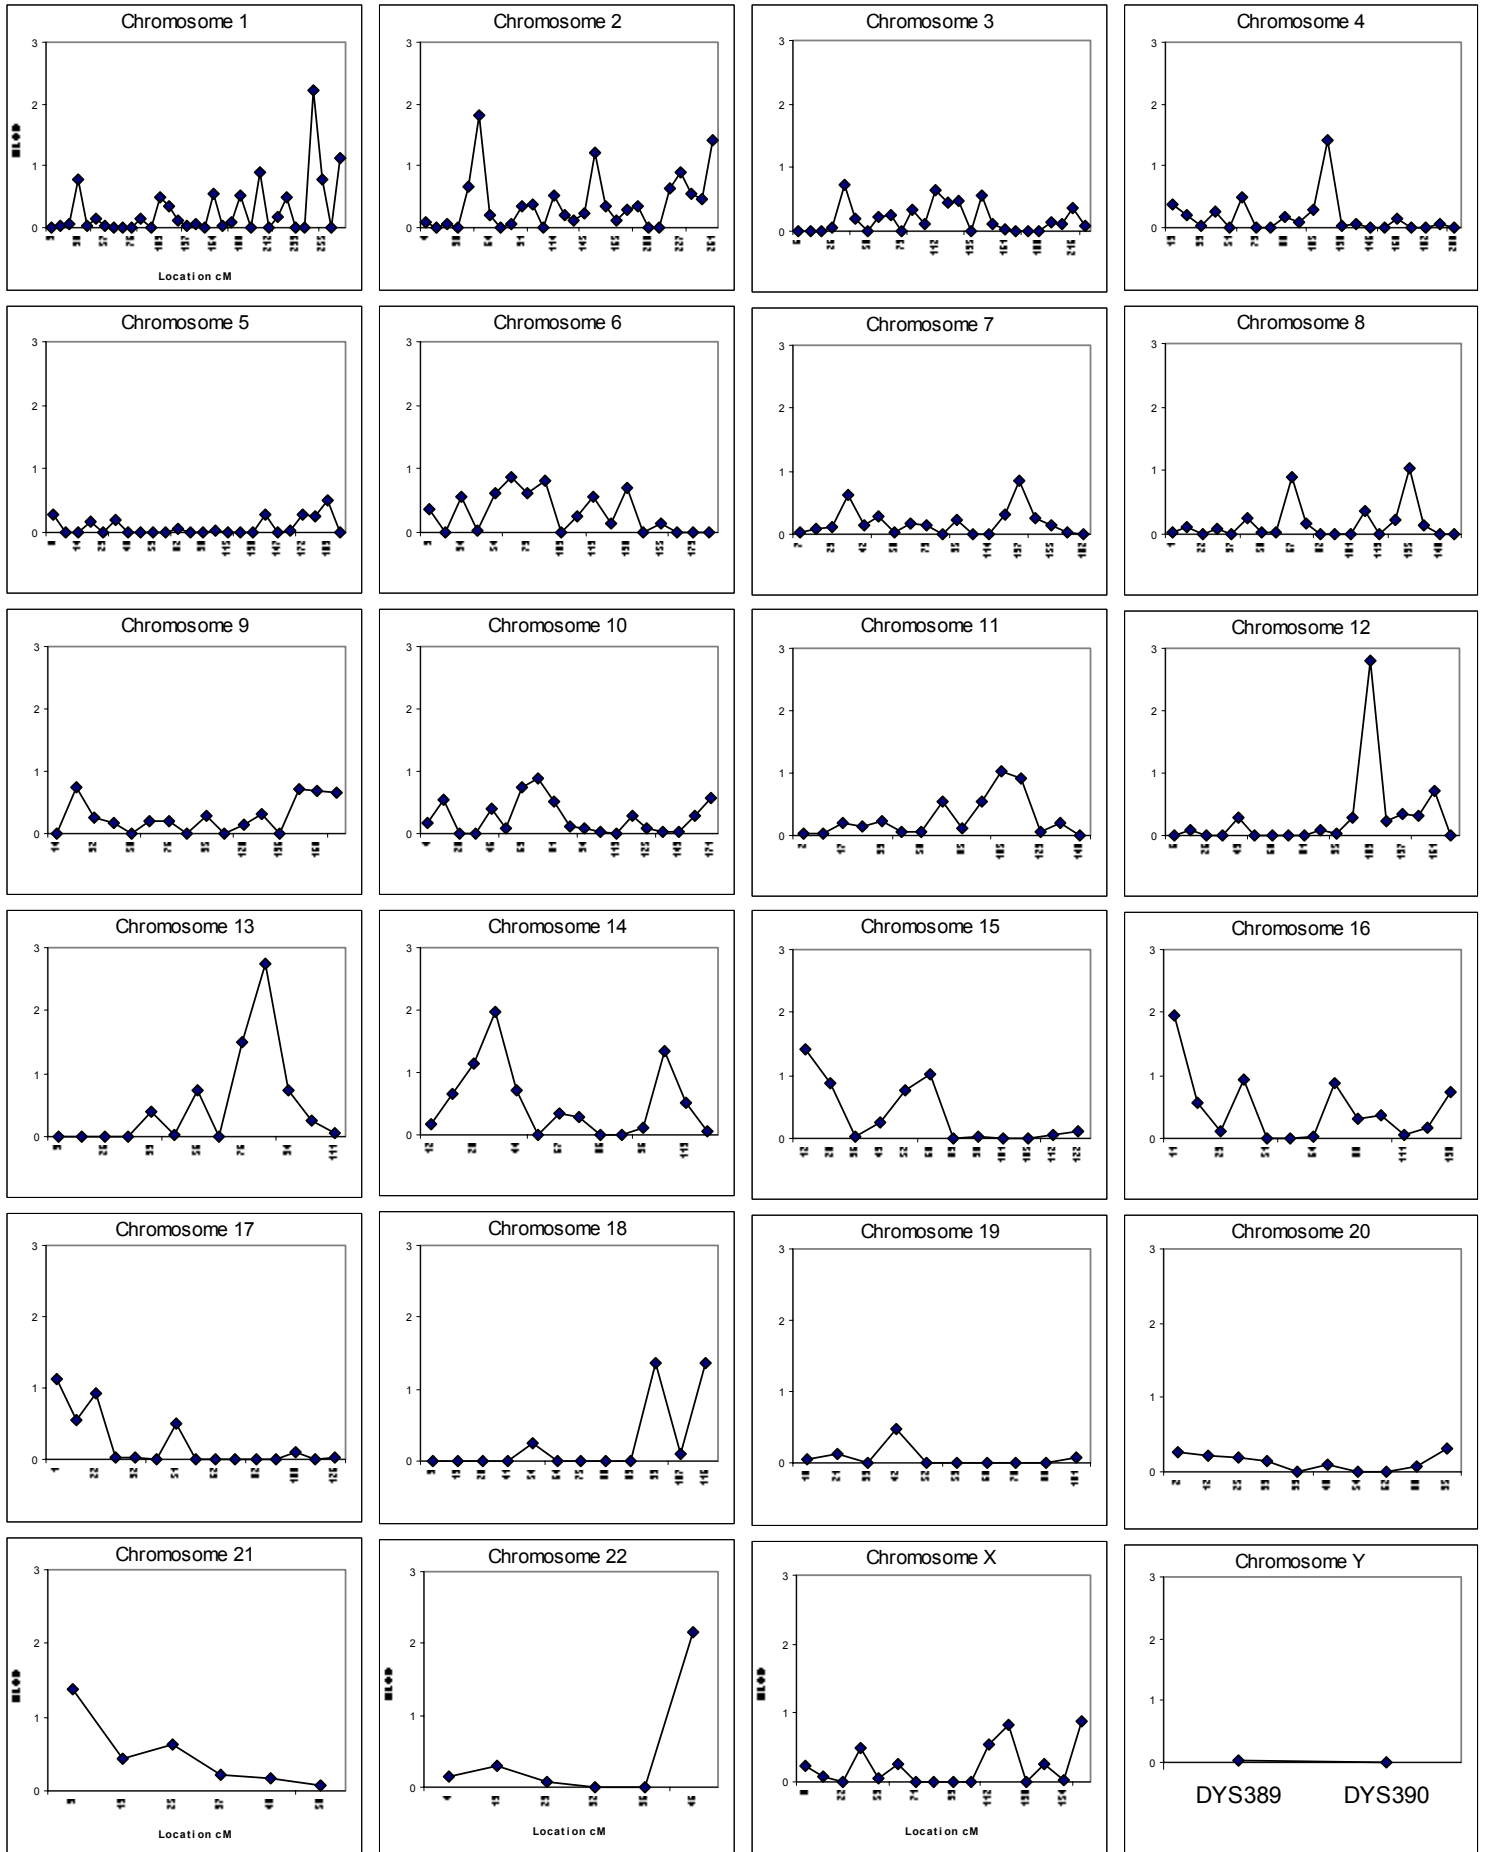

Figure 3

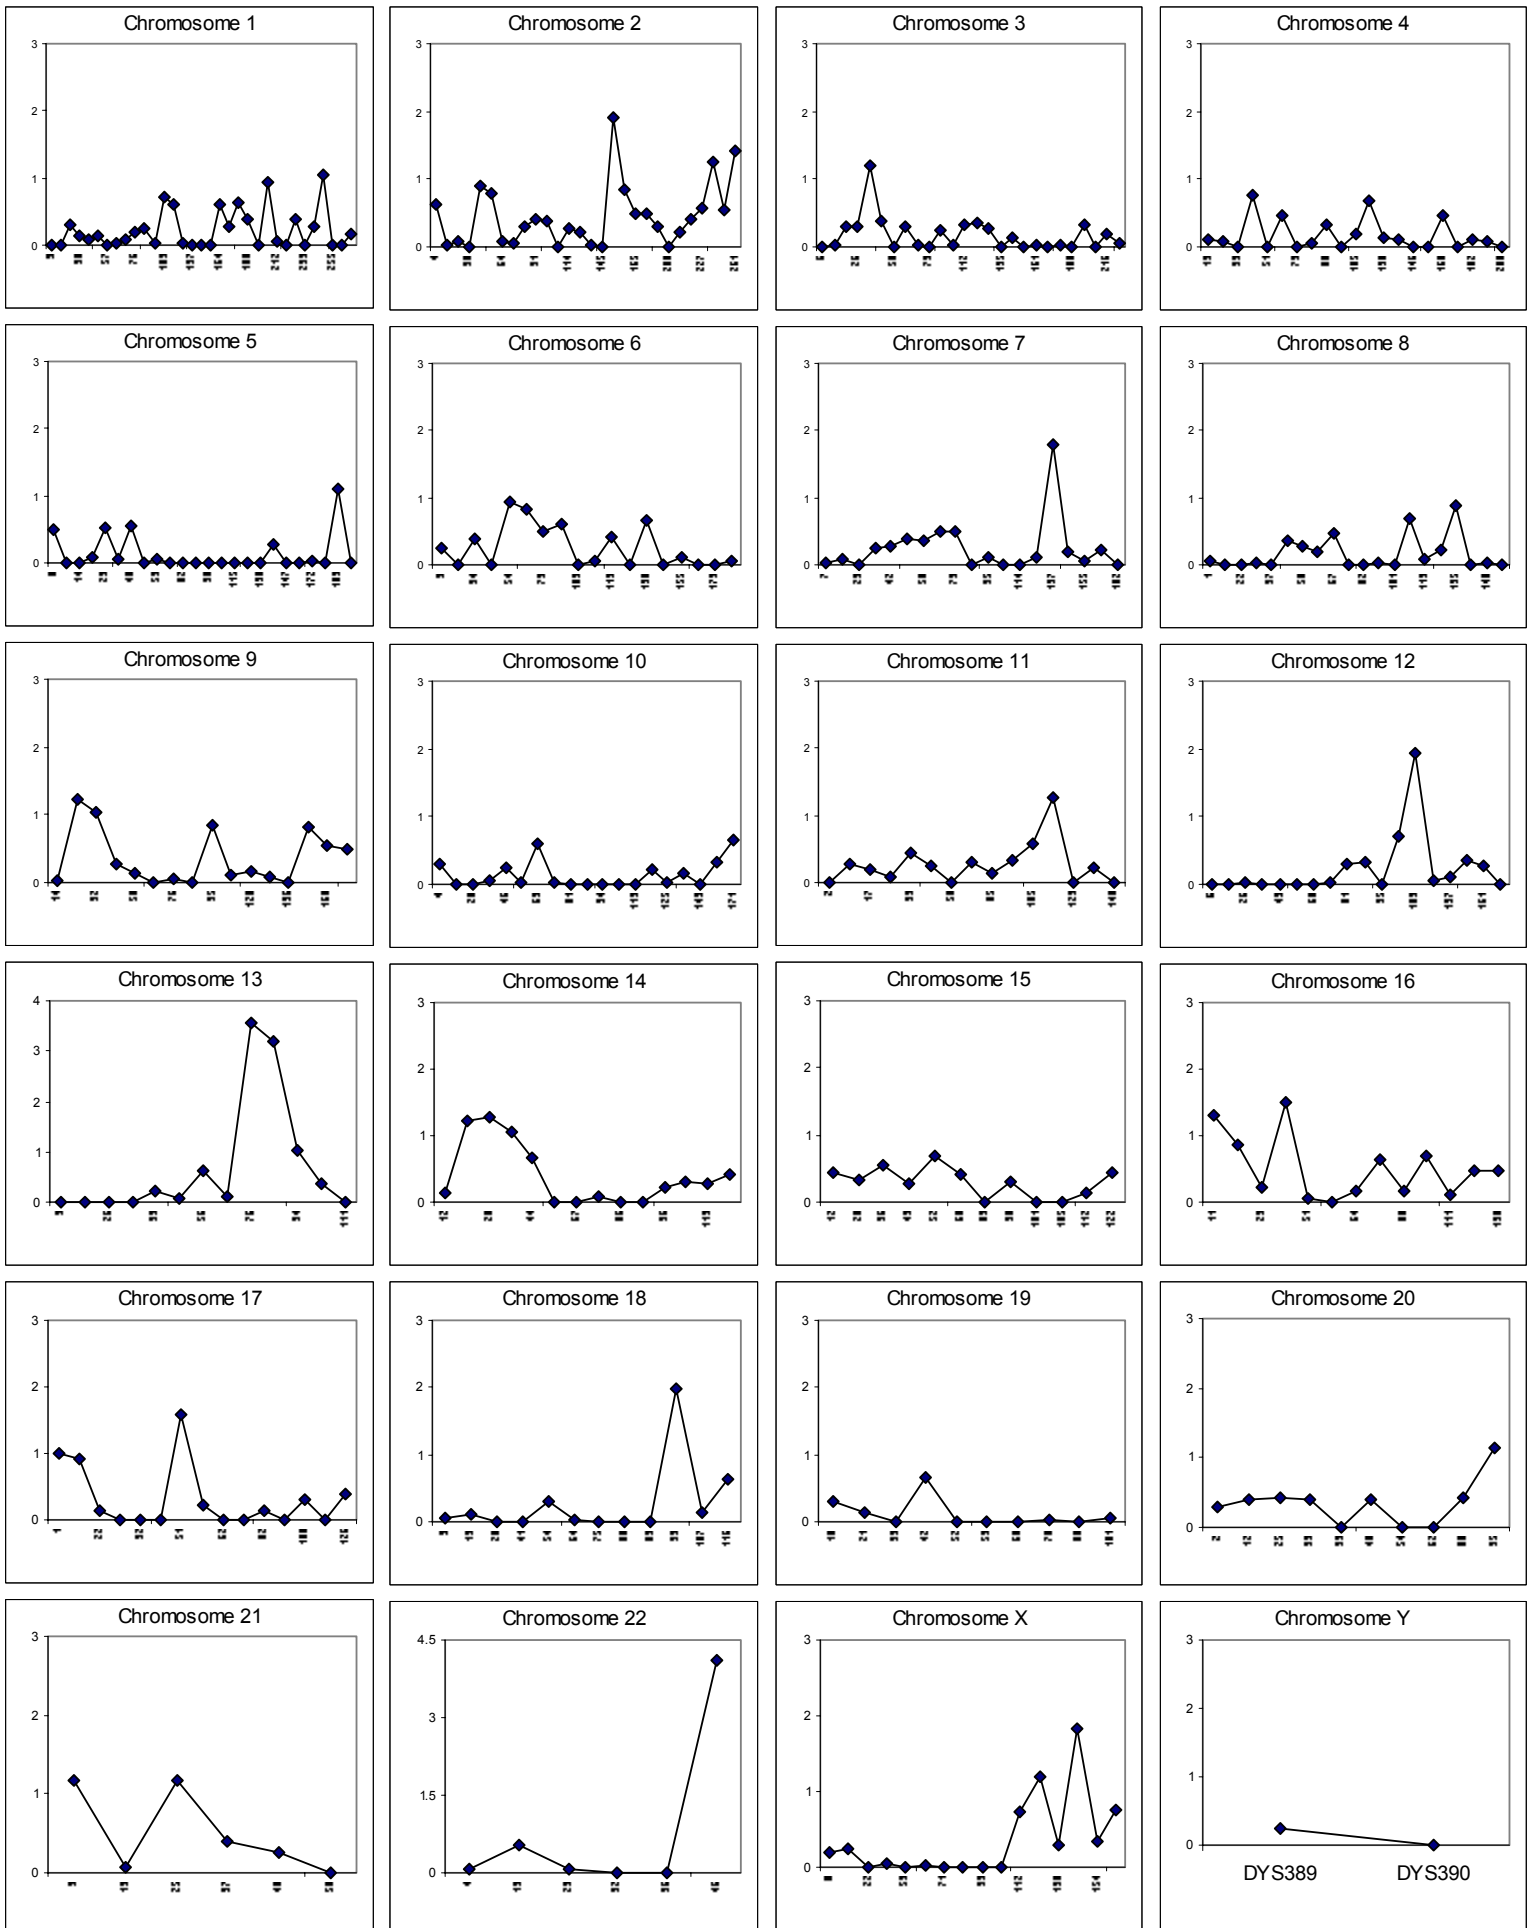

Figure 4

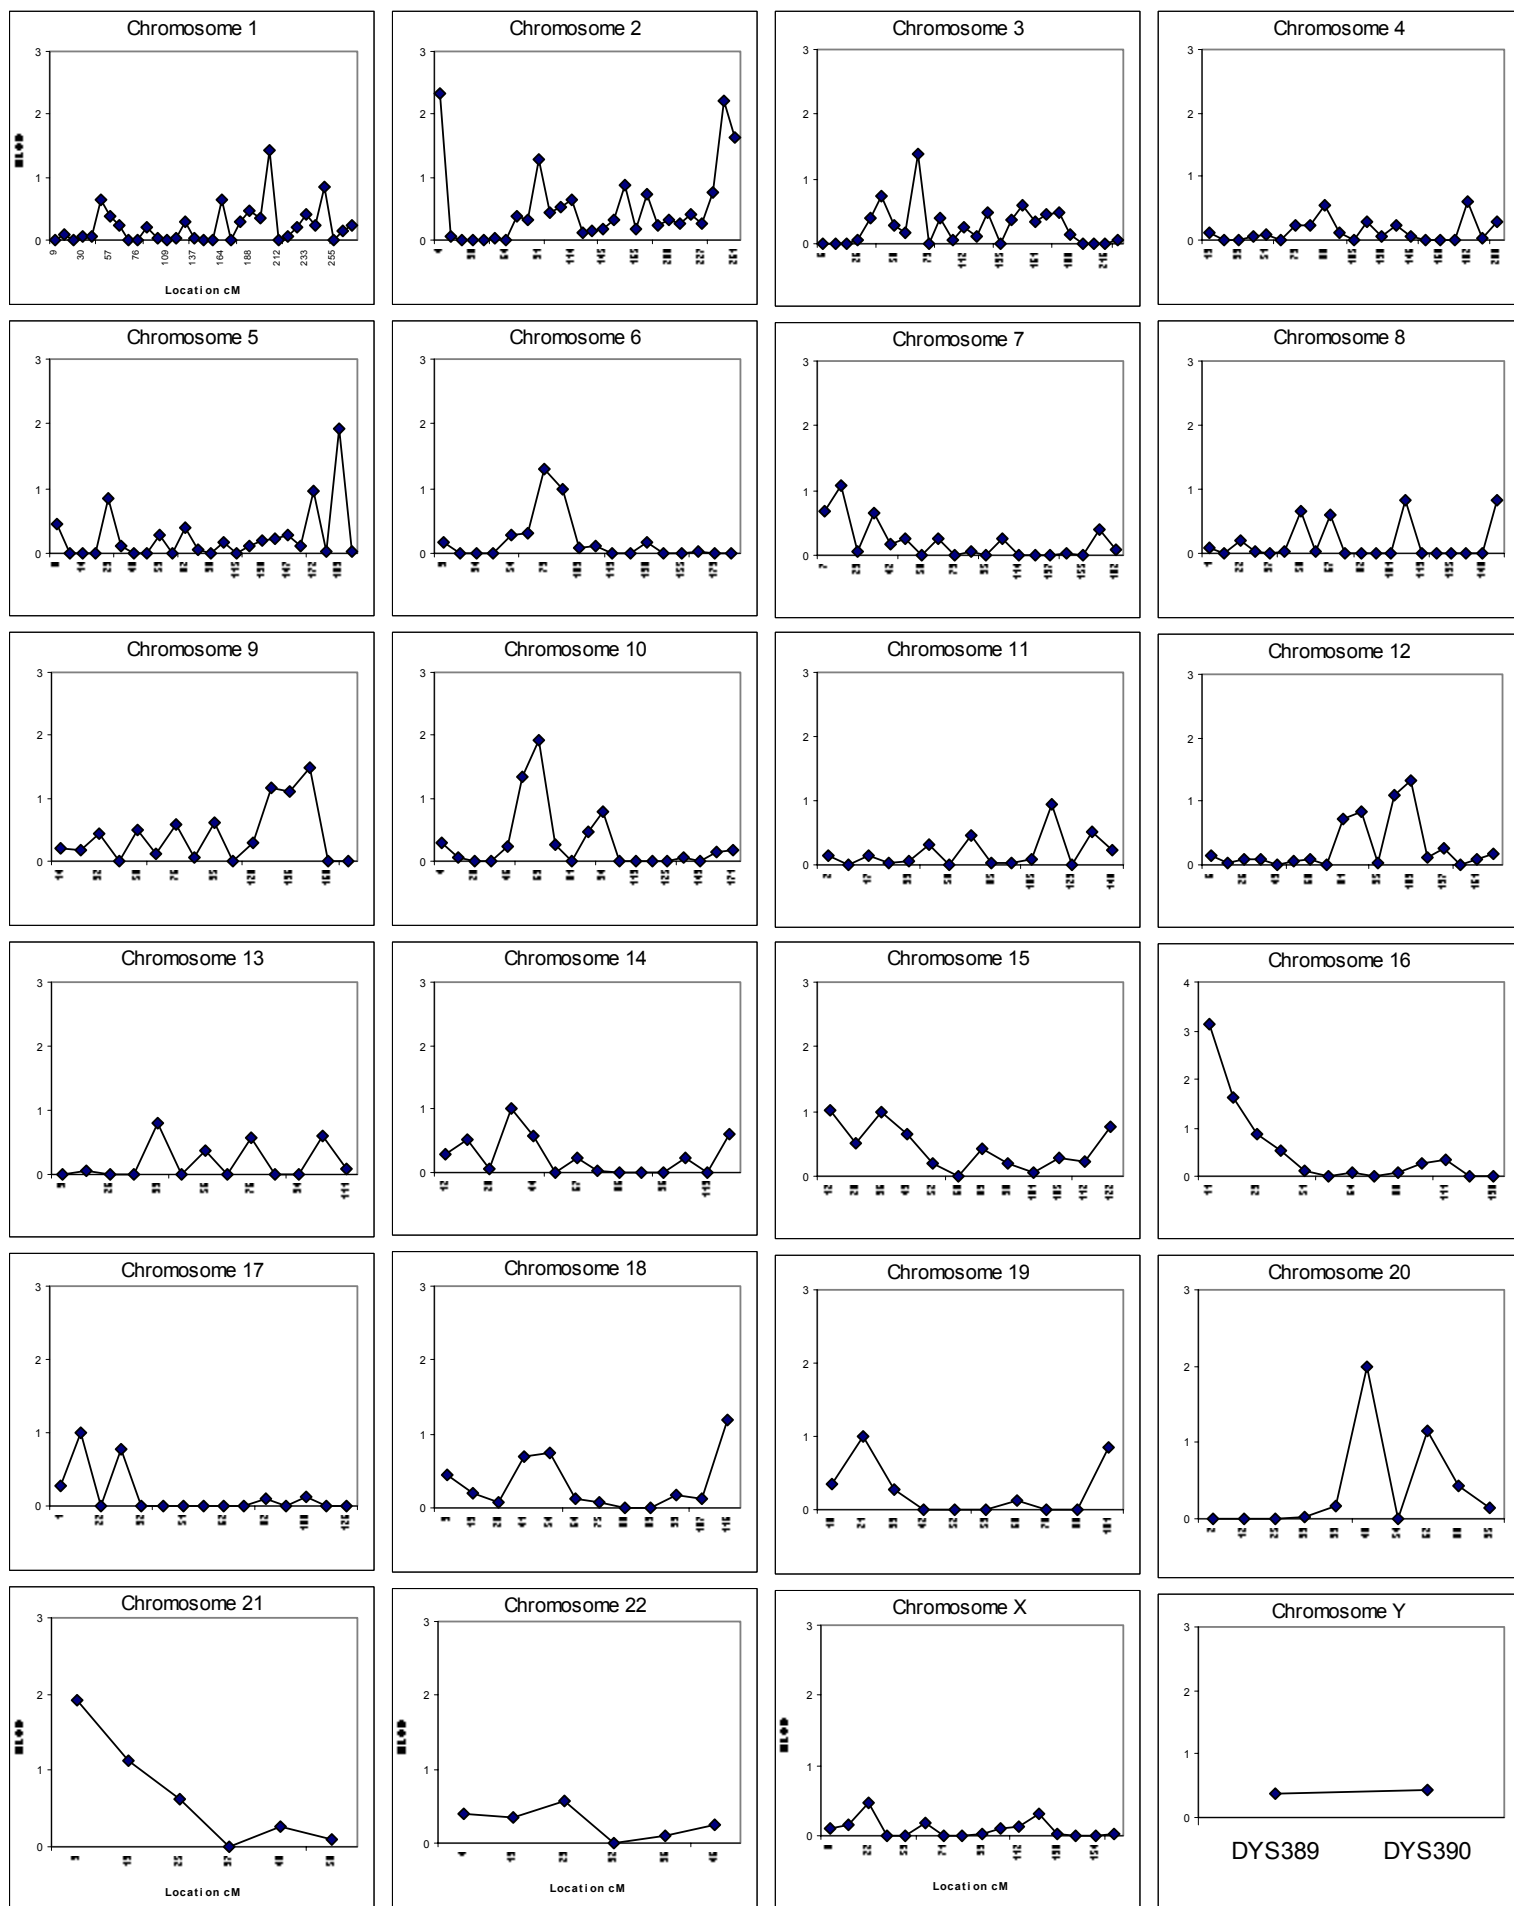

Figure 5

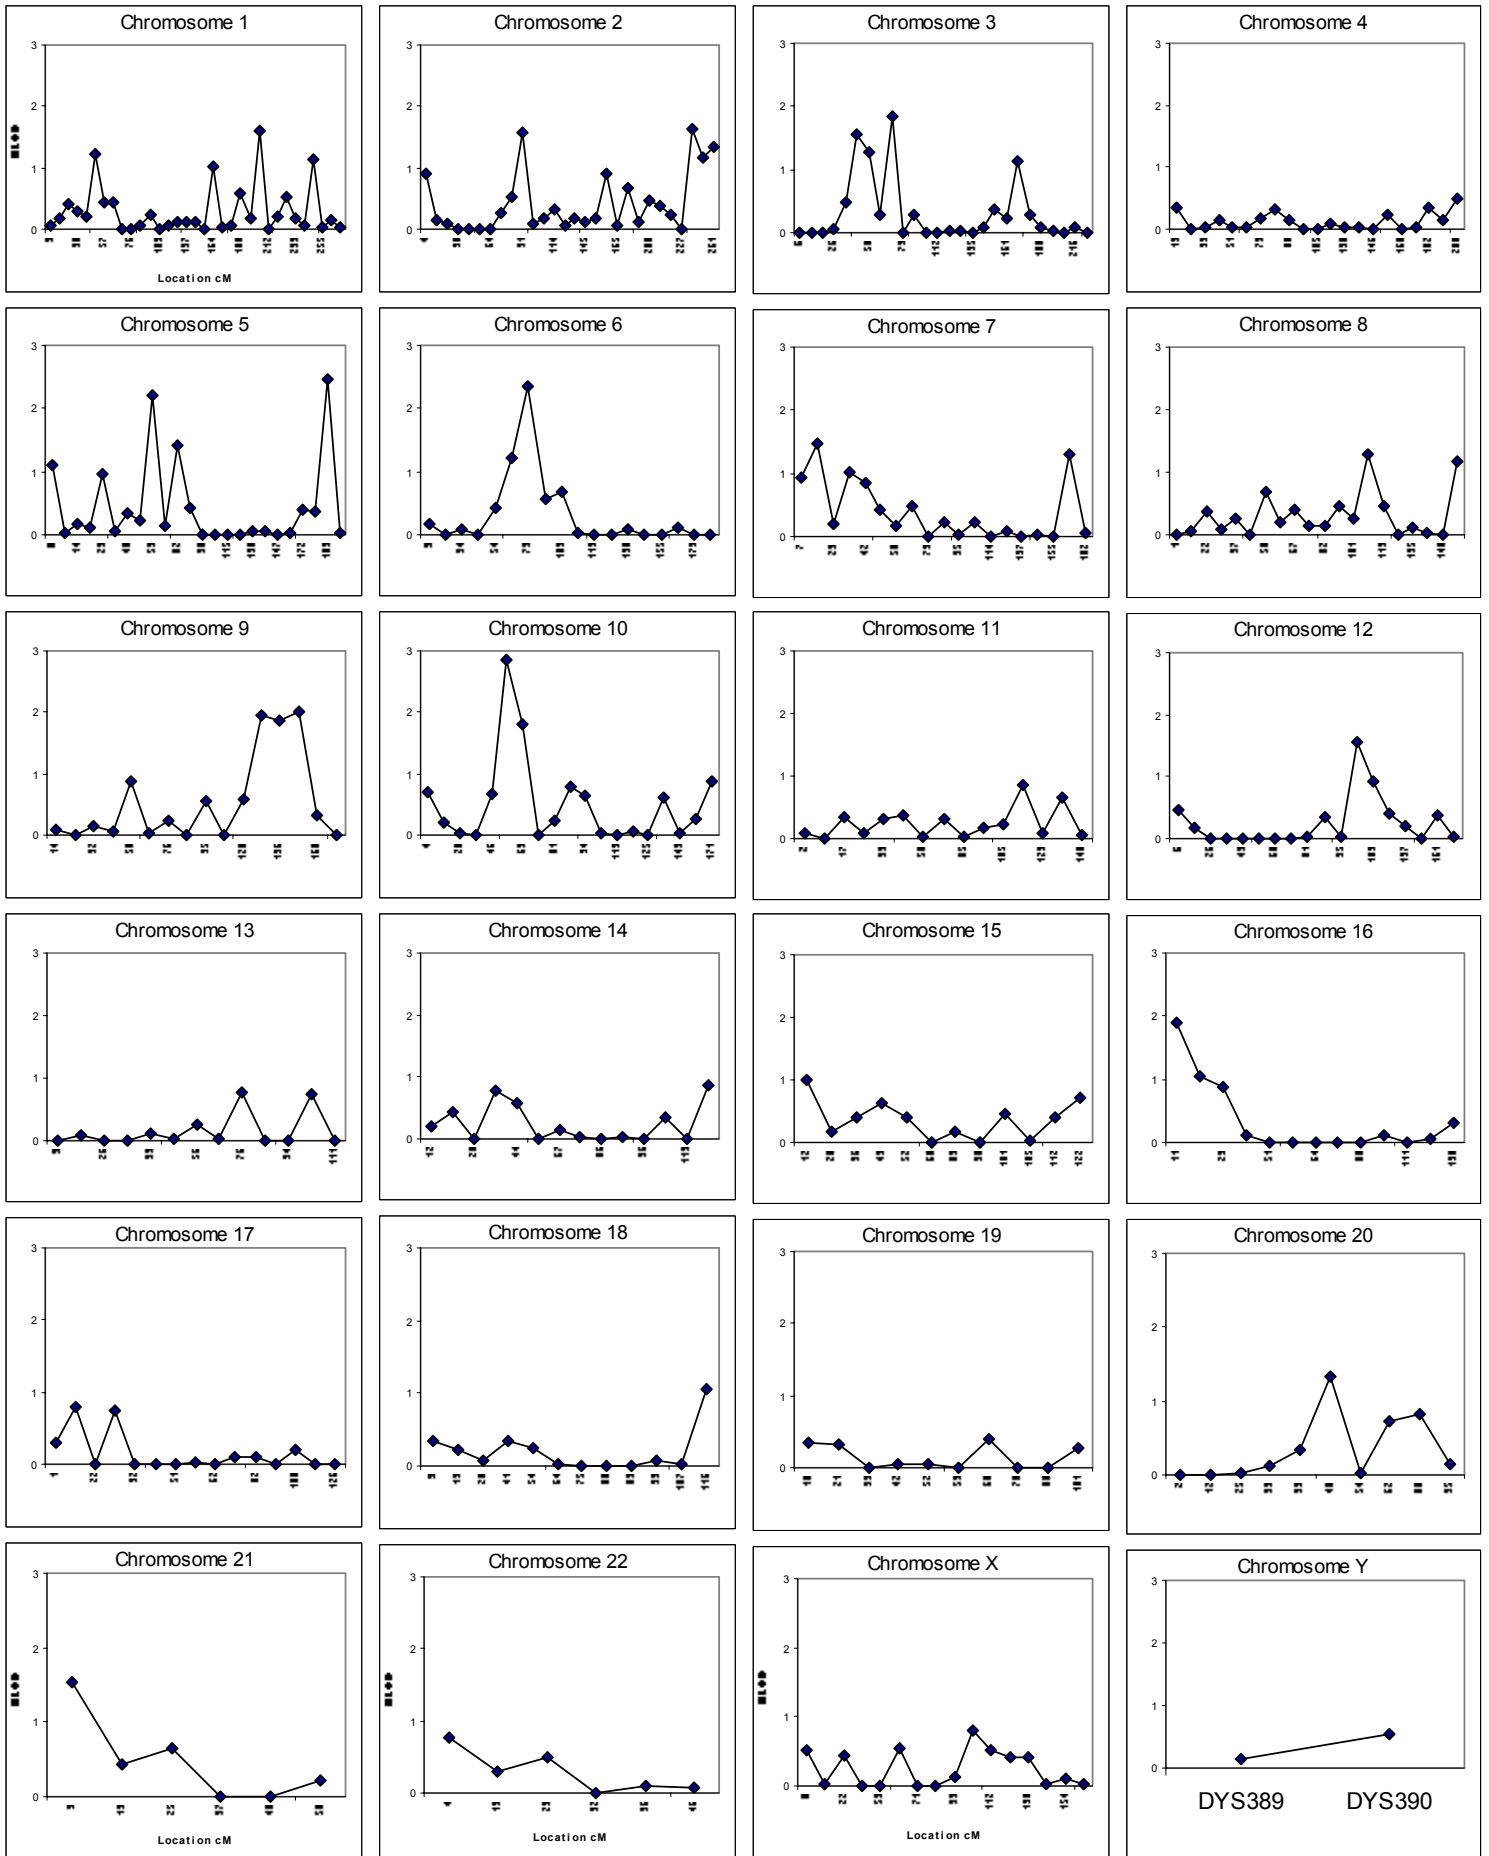

Figure 6

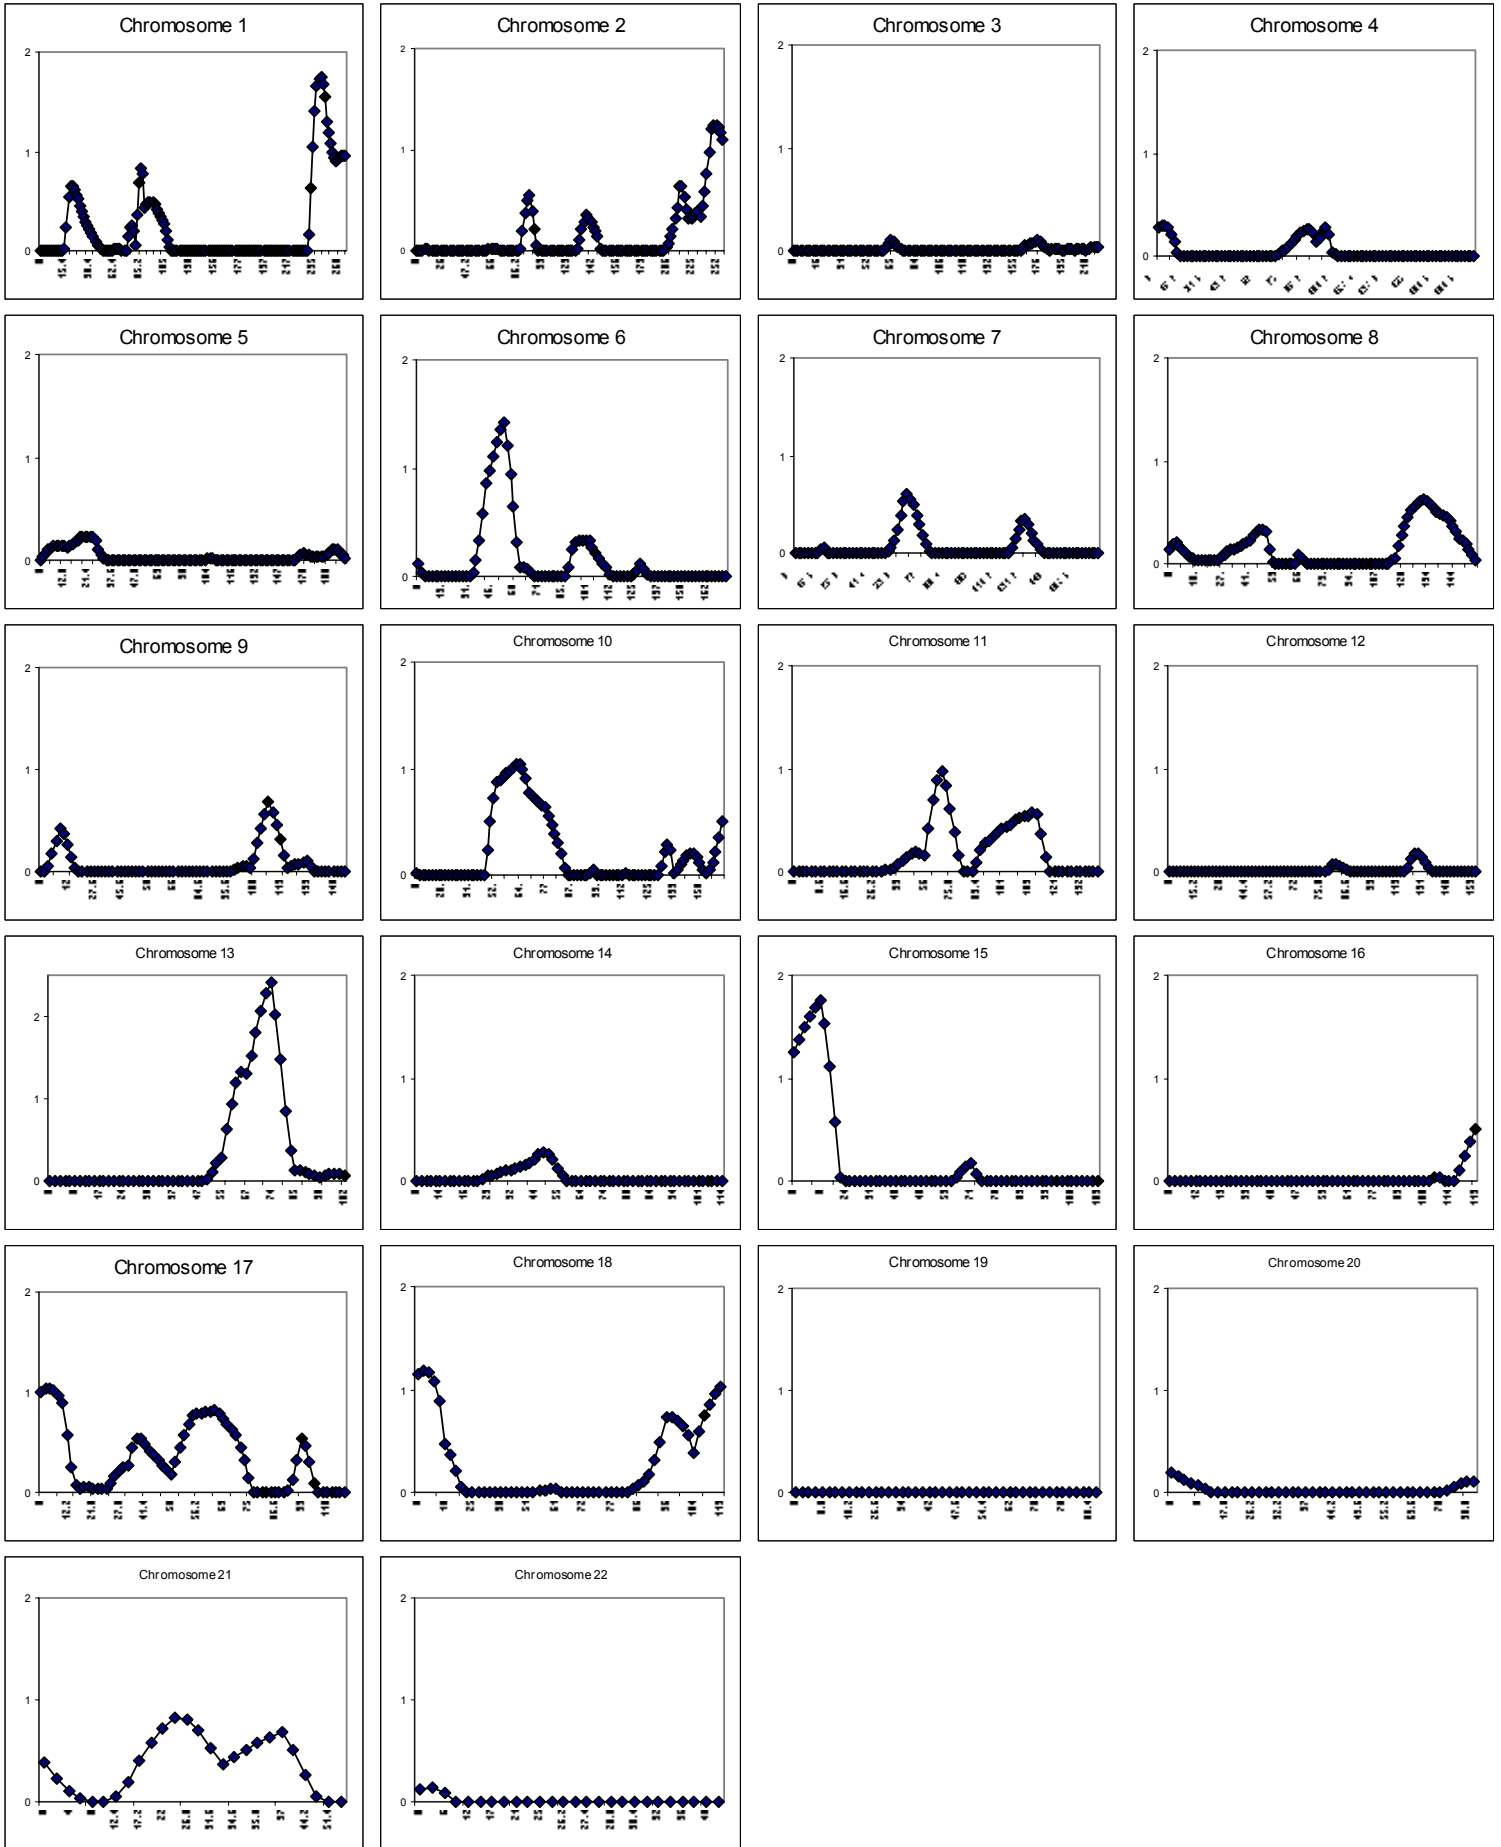

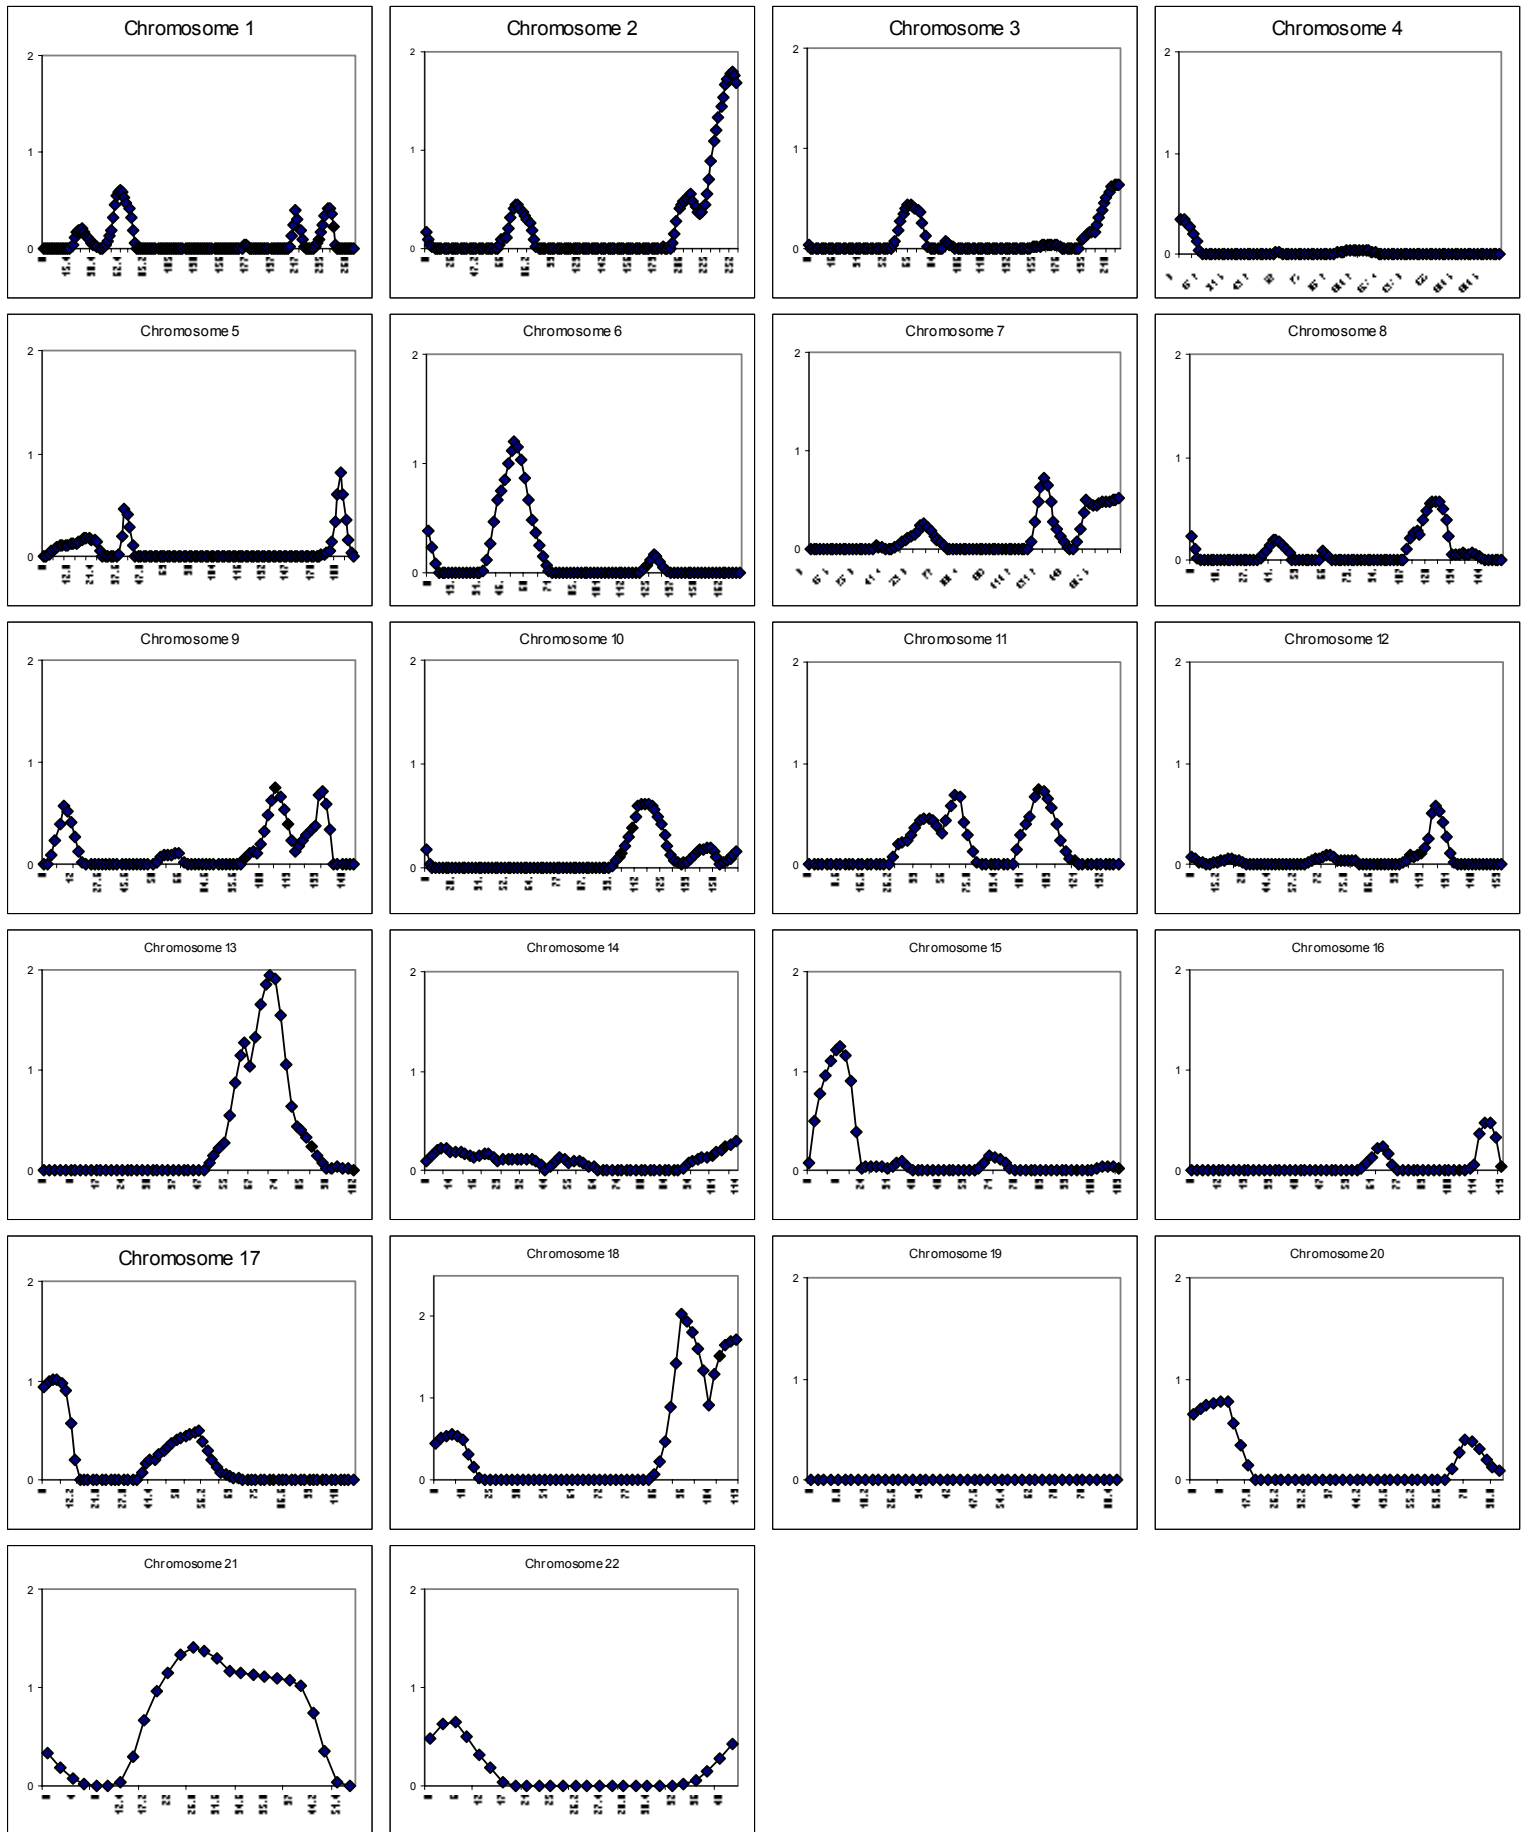

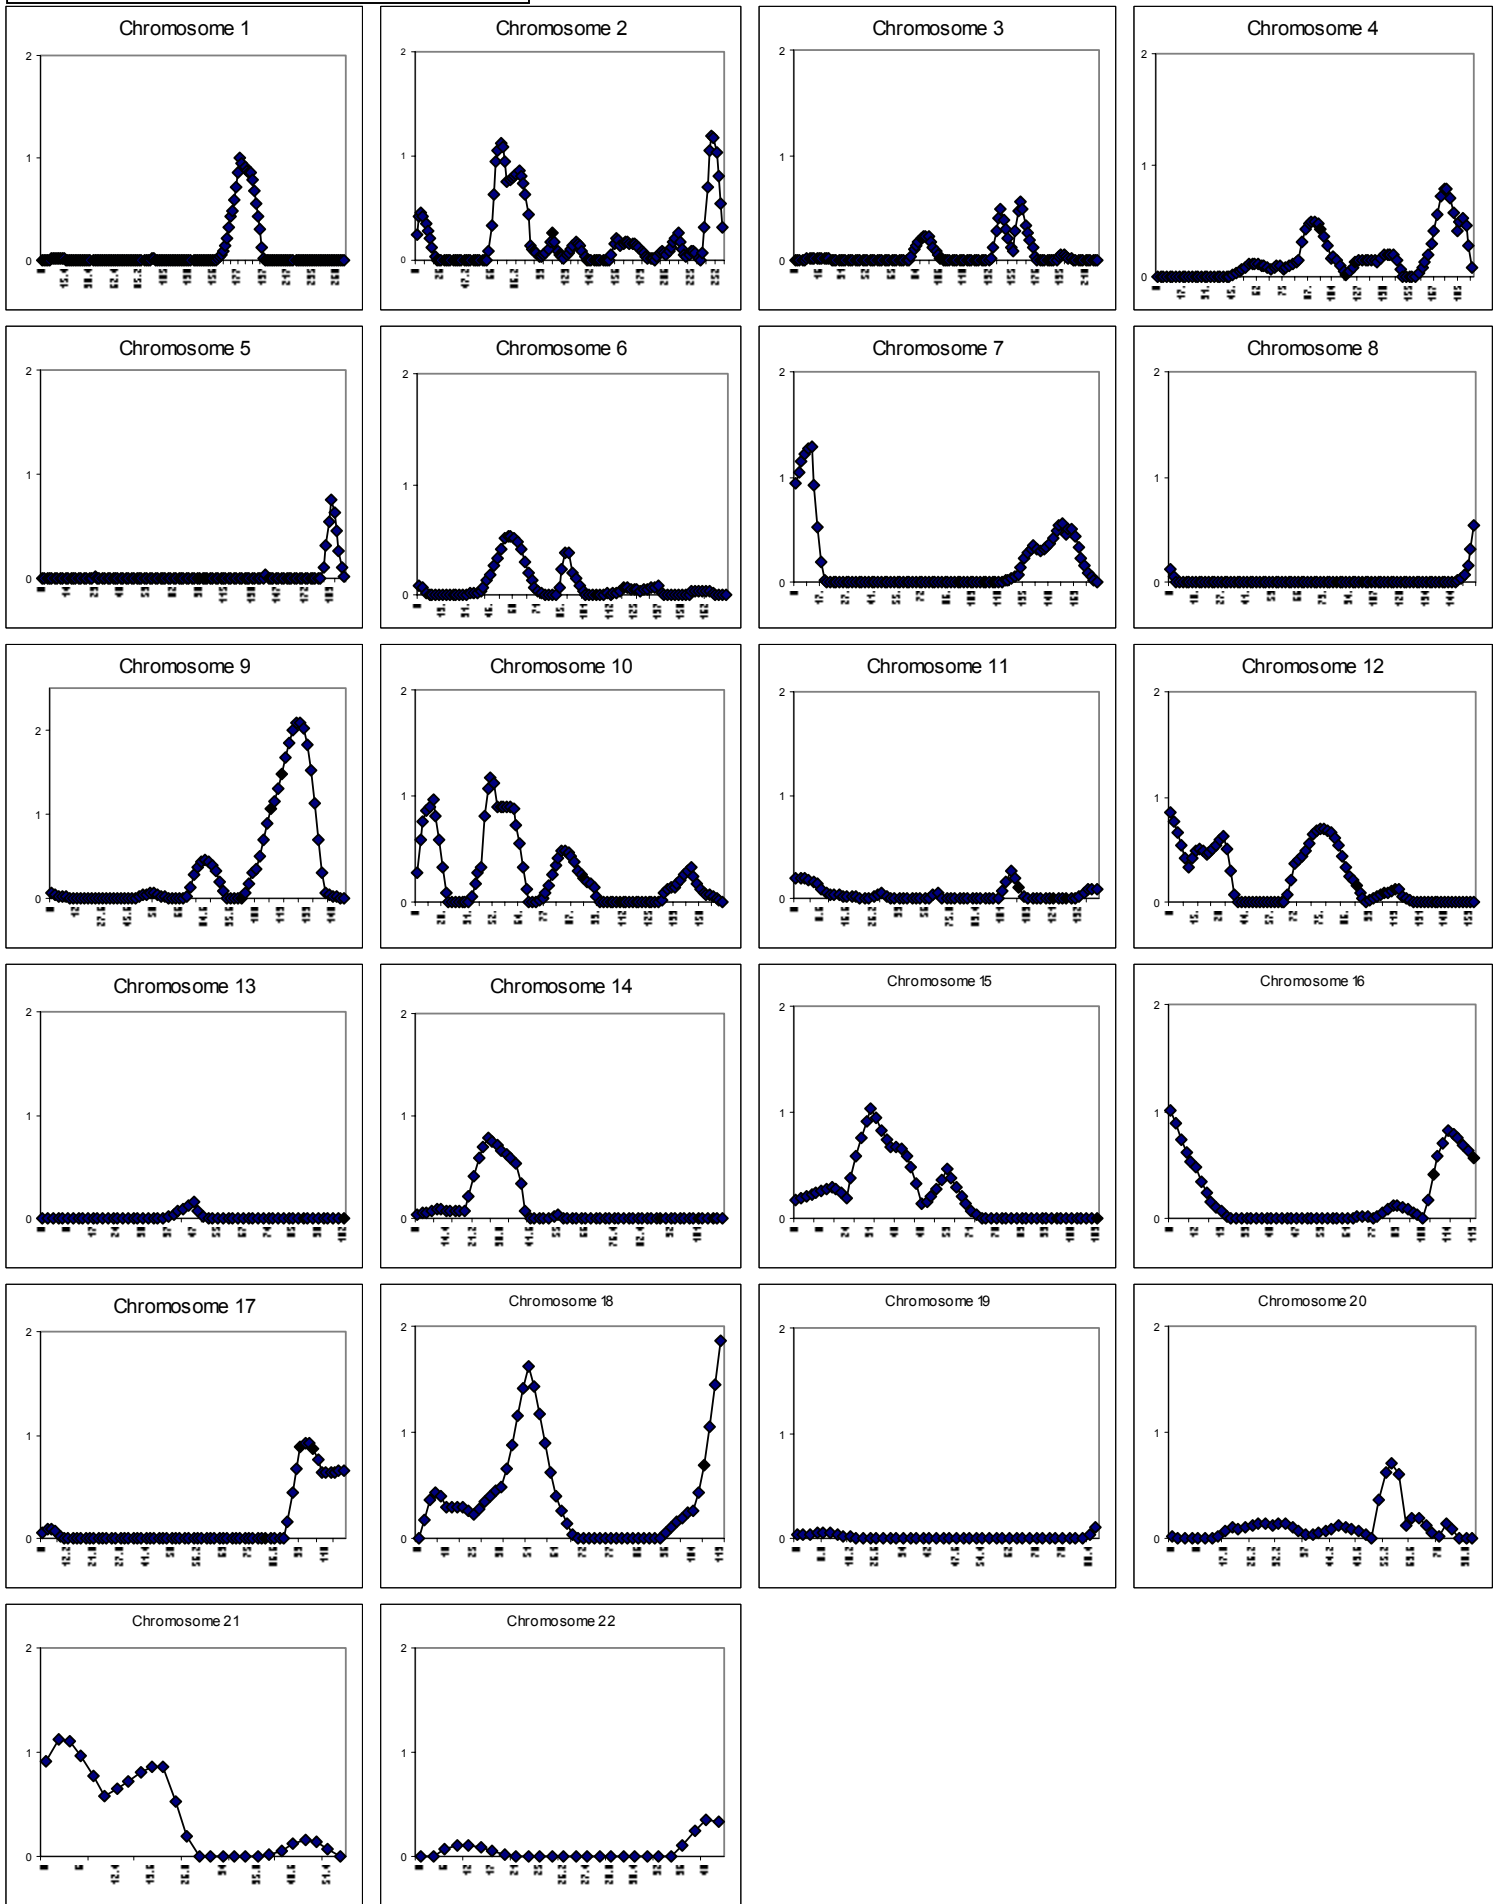

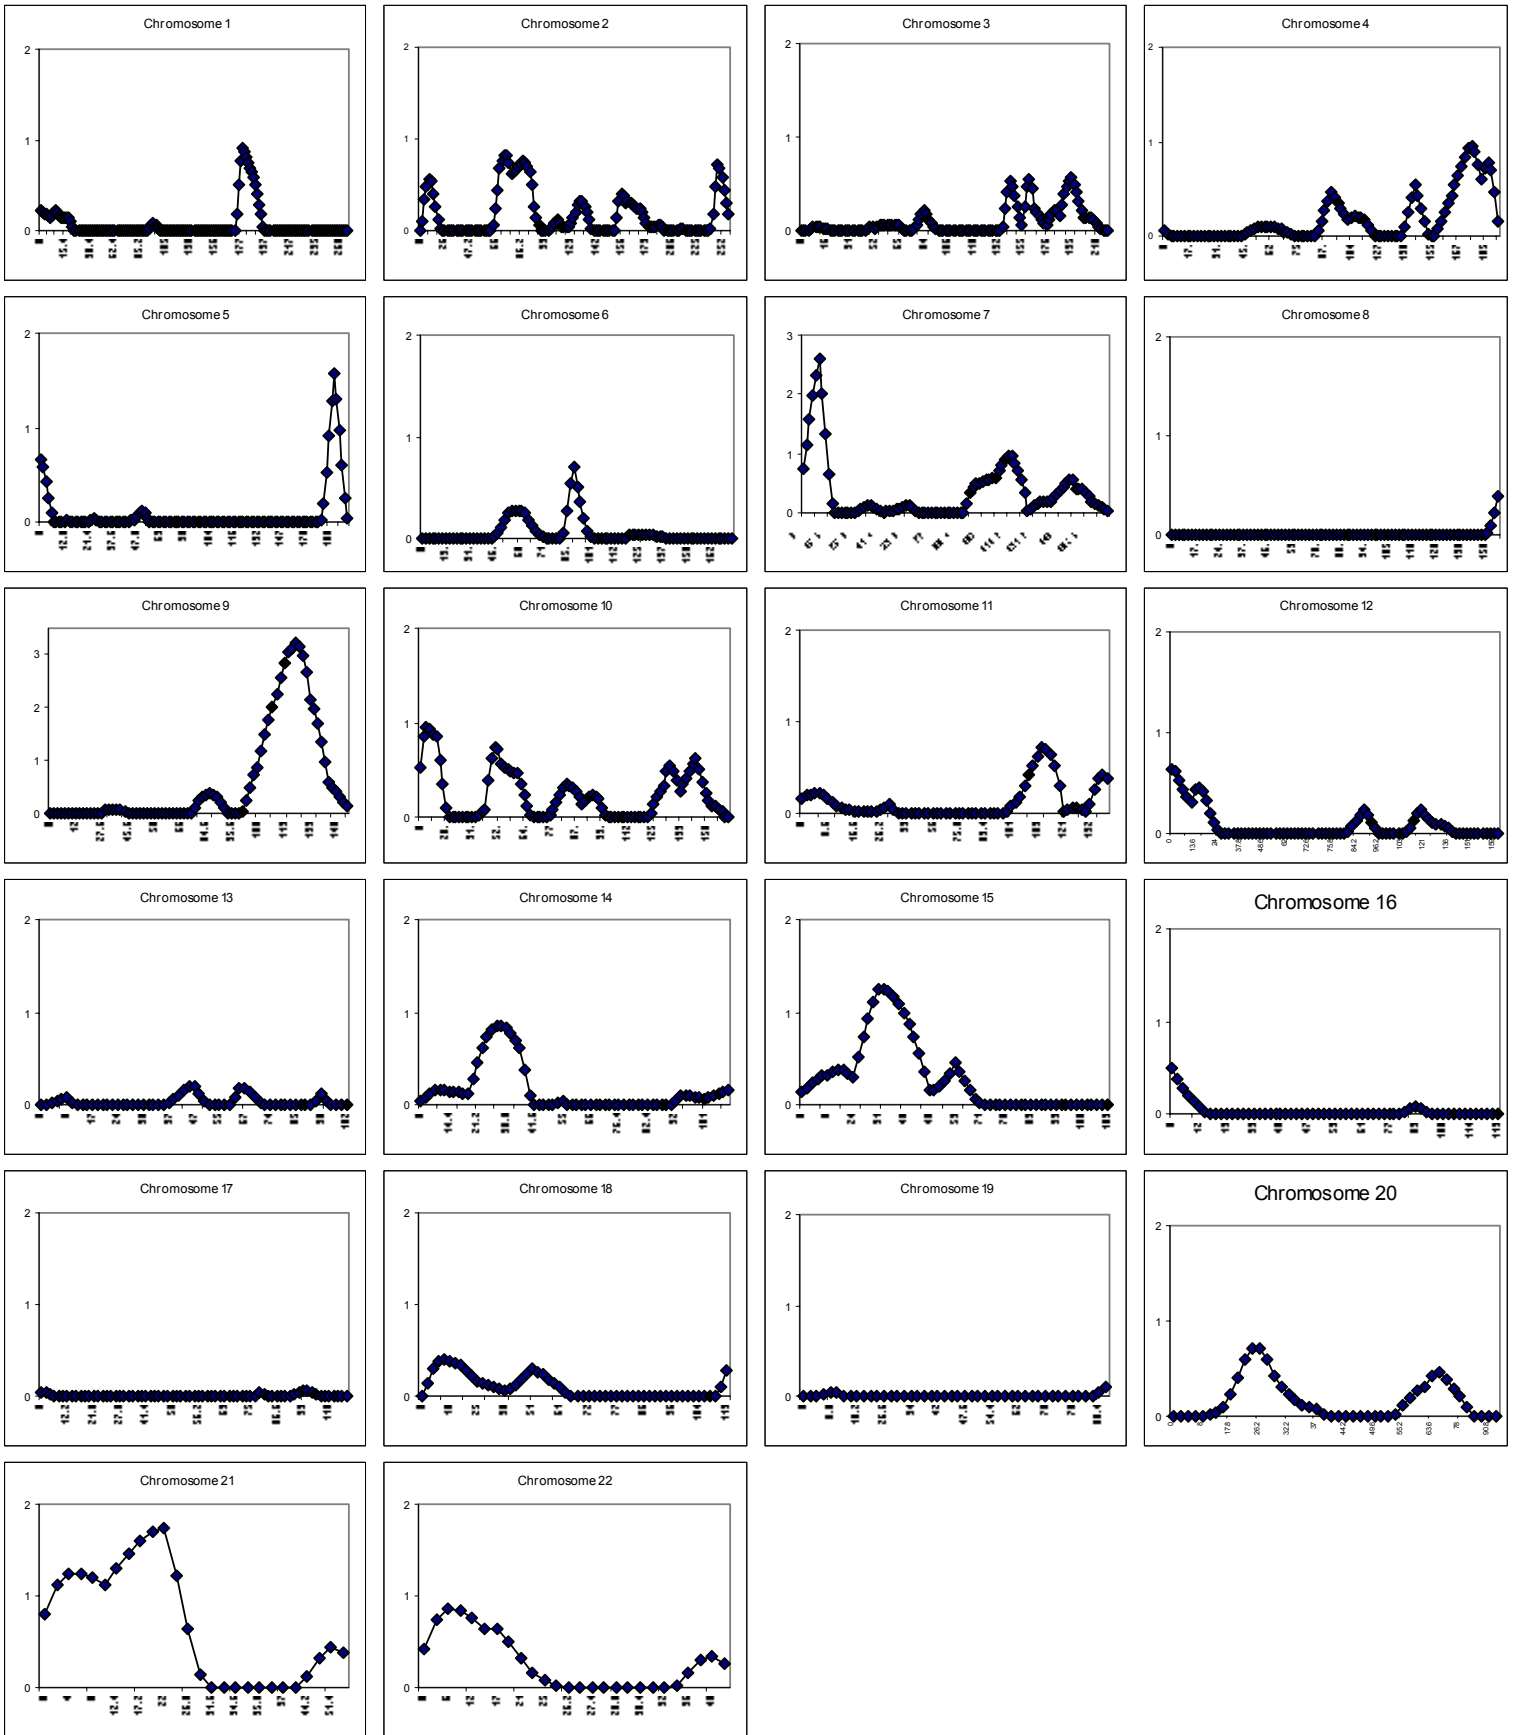



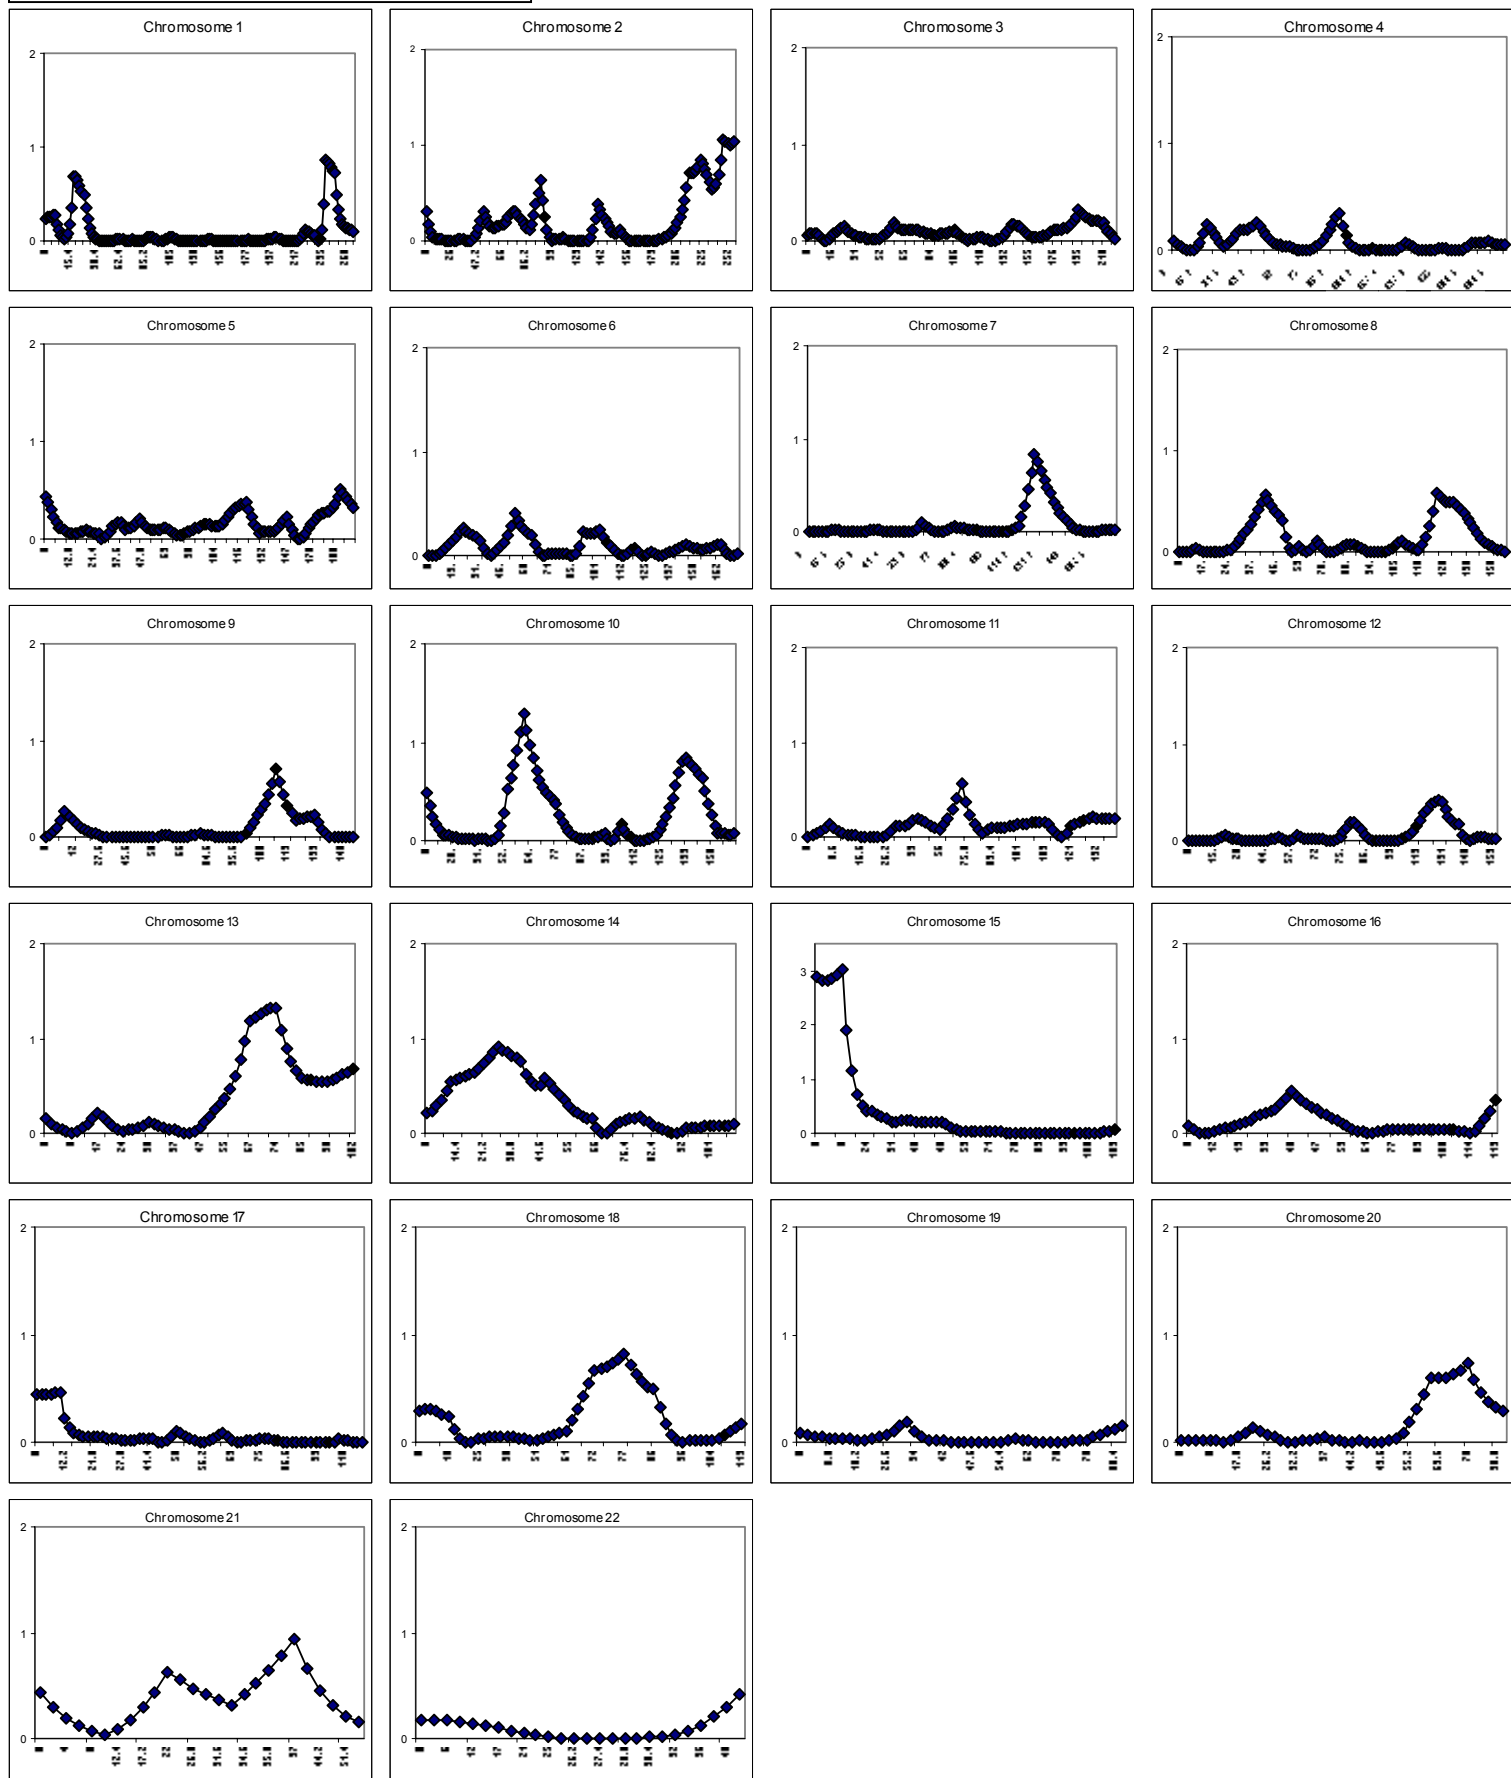

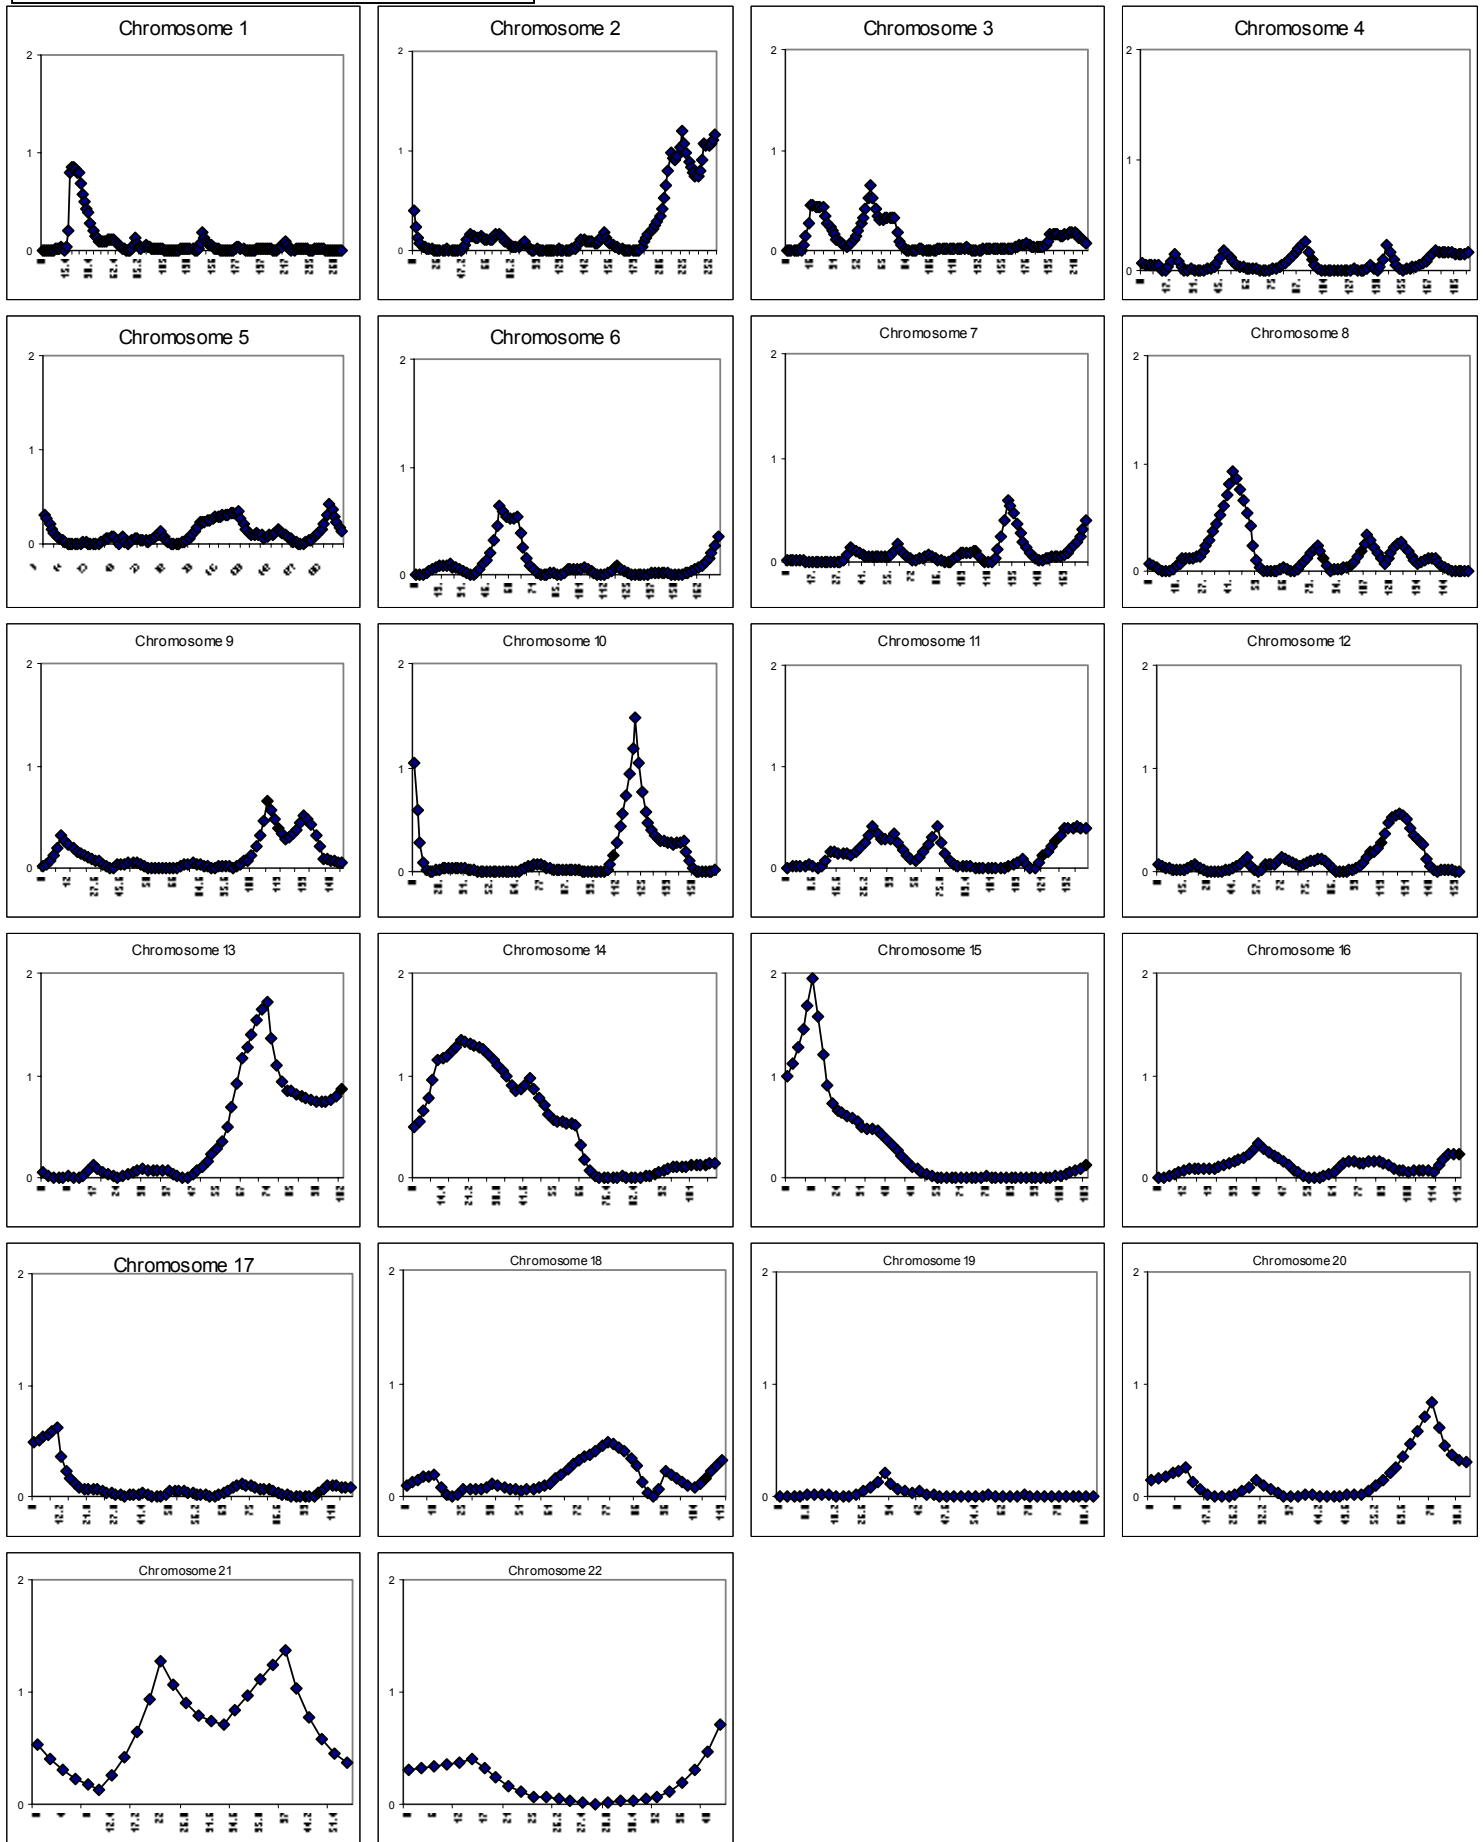

Supplement: pnas_0335669100_2.pdf [file pnas_0335669100_2.pdf]
